# Supplementary material for: Flufenamic Acid Inhibits Adipogenic Differentiation of Mesenchymal Stem Cells by Antagonizing the PI3K/AKT Signaling Pathway
Source: Stem Cells Int. 2020 Mar 16;2020:1540905. doi: 10.1155/2020/1540905 (PMC7102471; doi:10.1155/2020/1540905)
Supplement: Supplementary Materials — Supporting Figure 1: 1‰ DMSO did not affect lipid droplet formation in hMSCs. Supporting Figure 2: quantitative analysis of proteins bands in Figure 5 ARRIVE checklist. [file 1540905.f1.zip]

Archive with 2 entries (2 files):
- ARRIVE Checklist.pdf
- Supporting Figures.docx
